# Supplementary material for: MEGA dPCR reveals chromosomal aberrations, NHEJ precise repair, recurrent nuclease cleavage and DSB half-life
Source: Research Square preprint supplement (doi:10.21203/rs.3.rs-4577114/v1), 2024-06-26
Supplement: Supplementary file 1 [file a82fad9e65d9e4a64e729c4d.xlsx]

## Sheet: Table 1 Primer and probes
	WAS
	Assay	Primer/Probe	Identifier	Sequence (5' > 3')	Flurophore	Amplicon length (bp)
	Edge	Primers	WAS Edge Fwd	CCCCTGGAGGACTTGTTTC		273
			WAS Edge Rev	CCAGCTCACCAAGCATTTTC
		Probes	WAS Cleavage Probe	CCCACTCATGGTGCTTTCTGCC	FAM	N/A
			WAS Distal Probe	CATCTCAAAGAGTCGCTGGTTCTCGTG	HEX
	Flanking	Primers	WAS 5' Flanking Fwd	TTCCTGTTCCCTTGCTGCTC		72
			WAS 5' Flanking Rev	GTCTTCTCTGGCGAGGCTC
			WAS 3' Flanking Fwd	GAGGAGCACCAGCGGTTC		73
			WAS 3' Flanking Rev	TCAAAGAGTCGCTGGTTCTCG
		Probes	WAS 5' Flanking Probe	CGGAAGTTCCTCTTCTTACCCTGCACCC	FAM	N/A
			WAS 3' Flanking Probe	CAGAACATACCCTCCACCCTCCTCCAG	HEX
	LoH (Chr. X)	Primers	ChrX pArm Fwd	CCTGGTAGCTTTCGATGTTGATG		195
			ChrX pArm Rev	GGCCTGGACCTATCTCAC
			ChrX qArm Fwd	TGTCAATAACAGGCACTTGACAAAC		115
			ChrX qArm Rev	CCTGAGGCGATGGTGAAAG
		Probes	ChrX pArm Probe	CTTTGGTGTCCACCCTCCACCTC	FAM	N/A
			ChrX qArm Probe	CAAGCATGGAAGCATCTCCCAAGGC	HEX
	Targeted integration	Primers	AAV TI Fwd	GAGTAGGTGTCATTCTATTCTGG		878
			WAS TI Rev	AGGCAGCAGACTAATACTG
			SPIDR Long Ref Fwd	GGATCTCCATTTTACACATAAGAC		882
			SPDR Ref Rev	GTTGGTGACTGCTGGATTAAG
		Probes	AAV TI Probe	AGGATTGGGAAGAGAATAGCAGGCATG	HEX	N/A
			SPIDR Ref Probe	CAGGGAGGGAAGATCCGGAC	FAM
	Sequencing	Primers	WAS Seq Fwd	TCAGGCTACCTAGGTGCTTTAG		691
			WAS Seq Rev	CTGGGAAGGGTGGATTATGAC
	CAST-Seq	Primers	Bait	TCCAAGCATCTCAAAGAGTC		N/A
			Decoy	GCAGGGTAAGAAGAGGAAC
			Nested	GACTGGAGTTCAGACGTGTGCTCTTCCGATCTGGAGGGTATGTTCTGCTGAACC
			Linker positive	GTAATACGACTCACTATAGGGCTCCGCTTAAGGGACT
			Linker negative	P-GTCCCTTAAGCGGAGC-NH2
	Long-read sequencing	Primers	WAS Long-read Seq Fwd	GCCAGTAGTGCTTACTTTGTGG		5107
			WAS Long-read Seq Rev	CCTCATGCTTTATCATTCACTGGC
	EMX1
	Assay	Primer/Probe	Identifier	Sequence (5' > 3')	Flurophore	Amplicon length (bp)
	Edge	Primers	EMX1 Edge & Flanking 5' Fwd	CCAGGTGAAGGTGTGG		182
			EMX1 Edge & Flanking 3' Rev	GTTGCCCACCCTAGTC
		Probes	EMX1 Edge Cleavage LNA Probe	C+T+T+C+T+T+CTTCTGCTCGGACTC	FAM	N/A
			EMX Edge Distal & Flanking 3' Probe	TGGAGGTGACATCGATGTCCTCC	HEX
	Flanking	Primers	EMX1 Edge & Flanking 5' Fwd	CCAGGTGAAGGTGTGG		62
			EMX1 Flanking 5' Rev	CCTCCTCCAGCTTCTG
			EMX1 Flanking 3' Fwd	ACGAAGCAGGCCAATG		58
			EMX1 Edge & Flanking 3' Rev	GTTGCCCACCCTAGTC
		Probes	EMX1 Flanking 5' Probe	TCCAGAACCGGAGGACAAAGTACAAAC	FAM	N/A
			EMX1 Edge Distal & Flanking 3' Probe	TGGAGGTGACATCGATGTCCTCC	HEX
	LoH (Chr. 2)	Primers	Chr2 p Arm Fwd	GACCACAACAAGGTACCG		100
			Chr2 pArm Rev	GGTTGTCATCTGCTCCAC
			Chr2 qArm Fwd	GACGAAGGATGGCAACAG		100
			Chr2 qArm Rev	CAGTGAGCCAAACGACG
		Probes	Chr2 pArm Probe	TCGACCCGCTGGTGTCTTGC	FAM	N/A
			Chr2 qArm Probe	CATCAAAGGCTCCTCGTTGAGCTCG	HEX
	Sequencing	Primers	EMX1 Seq Fwd	CTGCCGGCTTCCAGAG		689
			EMX1 Seq Rev	AGCCAGCCCATTGCTTG
	FANCF
	Assay	Primer/Probe	Identifier	Sequence (5' > 3')	Flurophore	Amplicon length (bp)
	Edge	Primers	FANCF Edge & Flanking 5' Fwd	GGATGTTCCAATCAGTACGC		204
			FANCF Edge & Flanking 3' Rev	GATGTGGCGCAGGTAG
		Probes	FANCF Edge LNA Probe	CA+G+G+T+G+C+TGCAGAAGGGATTCC	FAM	N/A
			FANCF Edge Distal & Flanking 3' Probe	CCCAGGTGCTGACGTAGGTAGT	HEX
	Flanking	Primers	FANCF Edge & Flanking 5' Fwd	GGATGTTCCAATCAGTACGC		58bp
			FANCF Flanking 5' Rev	GCCCTACTTCCGCTTTC
			FANCF Flanking 3' Fwd	CTTCTGGCGGTCTCAAG		92bp
			FANCF Edge & Flanking 3' Rev	GATGTGGCGCAGGTAG
		Probes	FANCF Flanking 5' Probe	CCTTGGAGACGGCGACTCTC	FAM	N/A
			FANCF Edge Distal & Flanking 3' Probe	CCCAGGTGCTGACGTAGGTAGT	HEX
	LoH (Chr. 11)	Primers	Chr11 pArm Fwd	TCCCAGGTGGAGACAG		106
			Chr11 pArm Rev	CGAACGTGGGTAGCAC
			Chr11 qArm Fwd	TAGGTTTGACTGAGAAGAGCG		100
			Chr11 qArm Rev	GAGTTCTGGATGACACTGTC
		Probes	Chr11 pArm Probe	TGCTGAAGCAGCTACGGCCAG	FAM	N/A
			Chr11 qArm Probe	CCCAAGATACAGAACAGCCTCTCAGG	HEX
	Sequencing	Primers	FANCF Seq Fwd	GCGTTTCCTCACGTCACAG		702bp
			FANCF Seq Rev	GAGAGAGCAGGACGTCACA
	RAG1
	Assay	Primer/Probe	Identifier	Sequence (5' > 3')	Flurophore	Amplicon length (bp)
	Edge	Primers	RAG1 Edge & Flanking 5' Fwd	ACATCAGTGGGATATTGATATTGG		199
			RAG1 Edge & Flanking 3' Rev	CTTCAGGTGTCTTTTCAAAGGATC
		Probes	RAG1 Edge Cleavage LNA Probe	CA+C+C+TTGGGACTCAGTTC	FAM	N/A
			RAG1 Edge Distal & 3' Flanking Probe	CACCCGGAACAGCTTAAATTTCCATTCT	HEX
	Flanking	Primers	RAG1 Edge & 5' Flanking Fwd	ACATCAGTGGGATATTGATATTGG		71
			RAG1 Flanking 5' Rev	ATGCTGGCTGAGGTAC
			RAG1 Flanking 3' Fwd	AGATGAAATTCAGCACCCAC		86
			RAG1 Edge & Flanking 3' Rev	CTTCAGGTGTCTTTTCAAAGGATC
		Probes	RAG1 Flanking 5' Probe	TGAGAACAATGAAAACAAGTCATATTAAGACC	FAM	N/A
			RAG1 Edge Distal & 3' Flanking Probe	CACCCGGAACAGCTTAAATTTCCATTCT	HEX
	LoH (Chr. 11)	Primers	Chr11 pArm Fwd	TCCCAGGTGGAGACAG		106
			Chr11 pArm Rev	CGAACGTGGGTAGCAC
			Chr11 qArm Fwd	TAGGTTTGACTGAGAAGAGCG		100
			Chr11 qArm Rev	GAGTTCTGGATGACACTGTC
		Probes	Chr11 pArm Probe	TGCTGAAGCAGCTACGGCCAG	FAM	N/A
			Chr11 qArm Probe	CCCAAGATACAGAACAGCCTCTCAGG	HEX
	Sequencing	Primers	RAG1 Seq Fwd	CATTGTCCAGCTAGTACAATGAGGC		687
			RAG1 Seq Rev	AGTTGGGACTGGCTTCTGAC
	VEGFA
	Assay	Primer/Probe	Identifier	Sequence (5' > 3')	Flurophore	Amplicon length (bp)
	Edge	Primers	VEGFA Edge & 5' Flanking Fwd	CACCACAGGGAAGCTG		163
			VEGFA Edge & 3' Flanking Rev	GAGAGGGACACACAGATC
		Probes	VEGFA Edge Cleavage LNA Probe	CA+C+A+C+G+C+ACACACTCACTCACC	FAM	N/A
			VEGFA Edge Distal & 3' Flanking Probe	TGGAATCCTGGAGTGACCCCTG	HEX
	Flanking	Primers	VEGFA Edge & 5' Flanking Fwd	CACCACAGGGAAGCTG		58
			VEGFA 5' Flanking Rev	CACACGTCCTCACTCTC
			VEGFA 3' Flanking Fwd	TTGGAGCGGGGAGAAG		61
			VEGFA Edge & 3' Flanking Rev	GAGAGGGACACACAGATC
		Probes	VEGFA 5' Flanking Probe	TGAATGGAGCGAGCAGCGTCTTC	FAM	N/A
			VEGFA Edge Distal & 3' Flanking Probe	TGGAATCCTGGAGTGACCCCTG	HEX
	LoH (Chr. 6)	Primers	Chr6 pArm Fwd	GAGCCAGTCGAAGAGC		100
			Chr6 pArm Rev	GAGCACGTTGAGAGATCTC
			Chr6 qArm Fwd	GAGAAGGCACTGCCAC		99
			Chr6 qArm Rev	CTACACCACGCGGAAC
		Probes	Chr6 pArm Probe	CAGGACACCTCTGGCGTTCCC	FAM	N/A
			Chr6 qArm Probe	CCATCTGCACCACACCTATCACGC	HEX
	Sequencing	Primers	VEGFA Seq Fwd	CAGCTCCACAAACTTGGTGC		702
			VEGFA Seq Rev	CCACCAAGGTTCACAGCCTG
	BTK
	Assay	Primer/Probe	Identifier	Sequence (5' > 3')	Flurophore	Amplicon length (bp)
	Edge	Primers	BTK Edge Fwd	ACCCCACGTTCAAAGTCATAC		204
			BTK Edge Rev	CTGGGTCCTCAGGAACTTTC
		Probes	BTK Edge Cleavage Probe	CTATGGCCGCAGTGATTCTGGAG	FAM	N/A
			BTK Edge Distal Probe	AGGAGAGTTTGTGCACGGTCAAG	HEX	N/A
	Flanking	Primers	BTK 5' Flanking Fwd	GAACCAAGAGGGATGAGGATT		71
			BTK 5' Flanking Rev	GTTCACCTGTGTGCTGTTG
			BTK 3' Flanking Fwd	GCATCTTTCTGAAGCGATCC		83
			BTK 3' Flanking Rev	GTGCACGGTCAAGAGAAAC
		Probes	BTK 5' Flanking Probe	TCCTGGGTCCTCAGGAACTTTCATTATCAAC	FAM	N/A
			BTK 3' Flanking Probe	AACATCACCTCTAAACTTCAAGAAGCGCCT	HEX
	LoH (Chr. X)	Primers	ChrX pArm Fwd	CCTGGTAGCTTTCGATGTTGATG		195
			ChrX pArm Rev	GGCCTGGACCTATCTCAC
			ChrX qArm Fwd	TGTCAATAACAGGCACTTGACAAAC		115
			ChrX qArm Rev	CCTGAGGCGATGGTGAAAG
		Probes	ChrX pArm Probe	CTTTGGTGTCCACCCTCCACCTC	FAM	N/A
			ChrX qArm Probe	CAAGCATGGAAGCATCTCCCAAGGC	HEX
	Targeted integration	Primers	AAV TI Fwd	GAGTAGGTGTCATTCTATTCTGG		873
			BTK TI Rev	TTGCAAATTTCTTCAAATCTGCTG
			SPIDR Long Ref Fwd	GGATCTCCATTTTACACATAAGAC		882
			SPDR Ref Rev	GTTGGTGACTGCTGGATTAAG
		Probes	AAV TI Probe	AGGATTGGGAAGAGAATAGCAGGCATG	HEX	N/A
			SPIDR Ref Probe	CAGGGAGGGAAGATCCGGAC	FAM
	Sequencing	Primers	BTK Seq Fwd	CCTTTGACTTTCCGGCTTTAG		522
			BTK Seq Rev	ATACCTGAAACCTGACAGAGC
	IL7R
	Assay	Primer/Probe	Identifier	Sequence (5' > 3')	Flurophore	Amplicon length (bp)
	Edge	Primers	IL7R Edge Fwd	TTATACTTCCCTTGTCTGTGGTTAG		301
			IL7R Edge Rev	TTAGGGAACTGAATAACCTGAAACC
		Probes	IL7R Edge Cleavage LNA Probe	C+A+A+T+T+C+TAGGTACAACTTTTGGC	FAM	N/A
			IL7R Edge Distal Probe	CCTAGATCTAAGCTTCTCTGTCTTCCTCCC	HEX	N/A
	Flanking	Primers	IL7R 5' Flanking Fwd	CCTAGATCTAAGCTTCTCTGTCTTC		93
			IL7R 5' Flanking Rev	GAGAGAGAGTAGATGTGTGAGC
			IL7R 3' Flanking Fwd	CTTTACTTCAAGTCGTTTCTGGAG		119
			IL7R 3' Flanking Rev	GTTAGGGAACTGAATAACCTGAAAC
		Probes	IL7R 5' Flanking Probe	TCCCTCCCTTCCTCTTACTCTCATTCATT	FAM	N/A
			IL7R 3' Flanking Probe	TGGCTATGCTCAAAATGGTGAGTCATTTCT	HEX
	LoH (Chr. 5)	Primers	Chr5 pArm Fwd	CTCCGATGTCATCACCTCAC		101
			Chr5 pArm Rev	GGATAGACAATGTACCCACTTGG
			Chr5 qArm Fwd	TCTCACCACTGACCAGTTTG		114
			Chr5 qArm Rev	CGTACAGGATGATGTCCGT
		Probes	Chr5 pArm Probe	ACCGTCTTCATTTGCACCTGTGAG	FAM	N/A
			Chr5 qArm Probe	TGTGTGTGTCCATGTGCGAGG	HEX
	Targeted integration	Primers	AAV TI Fwd	GAGTAGGTGTCATTCTATTCTGG		878
			IL7R TI Rev	TCTAAATTCCCACATGCCTC
			SPIDR Long Ref Fwd	GGATCTCCATTTTACACATAAGAC		882
			SPDR Ref Rev	GTTGGTGACTGCTGGATTAAG
		Probes	AAV TI Probe	AGGATTGGGAAGAGAATAGCAGGCATG	HEX	N/A
			SPIDR Ref Probe	CAGGGAGGGAAGATCCGGAC	FAM
	Sequencing	Primers	IL7R Seq Fwd	TCTAGCCTAAGATAGCTTGAGCCTA		624
			IL7R Seq Rev	AACCACCCATAGTATTGATCCC
	SH2D1A
	Assay	Primer/Probe	Identifier	Sequence (5' > 3')	Flurophore	Amplicon length (bp)
	Edge	Primers	SH2D1A Edge & 5' Flanking Fwd	GTTGACTTGTGCCTGGC		172
			SH2D1A Edge & 3' Flanking Rev	AAATAGCTGCCATCCAGC
		Probes	SH2D1A Edge Cleavage LNA Probe	AT+G+G+A+CGCAGTGGCTGTGTATC	FAM	N/A
			SH2D1A Edge Distal & 3' Flanking Probe	CGAGAAGCTCCTGCTTGCCAC	HEX
	Flanking	Primers	SH2D1A Edge & 5' Flanking Fwd	GTTGACTTGTGCCTGGC		59
			SH2D1A 5' Flanking Rev	CGAGGAGGAGAACTGTG
			SH2D1A 3' Flanking Fwd	GCAAAATCAGCAGGGAAAC		64
			SH2D1A Edge & 3' Flanking Rev	AAATAGCTGCCATCCAGC
		Probes	SH2D1A 5' Flanking Probe	AGGGAGATGCCGCTGCTACTG	FAM	N/A
			SH2D1A Edge Distal & 3' Flanking Probe	CGAGAAGCTCCTGCTTGCCAC	HEX
	LoH (Chr. X)	Primers	ChrX pArm Fwd	CCTGGTAGCTTTCGATGTTGATG		195
			ChrX pArm Rev	GGCCTGGACCTATCTCAC
			ChrX qArm Fwd	TGTCAATAACAGGCACTTGACAAAC		115
			ChrX qArm Rev	CCTGAGGCGATGGTGAAAG
		Probes	ChrX pArm Probe	CTTTGGTGTCCACCCTCCACCTC	FAM	N/A
			ChrX qArm Probe	CAAGCATGGAAGCATCTCCCAAGGC	HEX
	Sequencing	Primers	SH2D1A Seq Fwd	TGGCCTCTGAGTAAACCGCA		718
			SH2D1A Seq Rev	AGCGAGGGATTGAGGCGAAA
	CCR5
	Assay	Primer/Probe	Identifier	Sequence (5' > 3')	Flurophore	Amplicon length (bp)
	Edge	Primers	CCR5 Edge & 5' Flanking Fwd	AGGGCAACTAAATACATTCTAGGAC		271
			CCR5 Edge Rev	TAGATGTCAGTCATGCTCTTCAG
		Probes	CCR5 Edge Cleavage Probe	CAGCCCGCCTCCTGCCTC	FAM	N/A
			CCR5 Edge Distal & 5' Flanking Probe	ATGCACAGGGTGGAACAAGATGGATTATC	HEX
	Flanking	Primers	CCR5 Edge & 5' Flanking Fwd	AGGGCAACTAAATACATTCTAGGAC		127
			CCR5 5' Flanking Rev	CAGGGCTCCGATGTATAATAATTG
			CCR5 3' Flanking Fwd	CTTTGGTTTTGTGGGCAAC		81
			CCR5 3' Flanking Rev	AGGTAGATGTCAGTCATGCT
		Probes	CCR5 3' Flanking Probe	CTGGTCATCCTCATCCTGATAAACTGC	FAM	N/A
			CCR5 Edge Distal & 5' Flanking Probe	ATGCACAGGGTGGAACAAGATGGATTATC	HEX
	LoH (Chr. 3)	Primers	Chr3 pArm Fwd	AAGAATCTGCCTGATTCACCTTC		114
			Chr3 pArm Rev	CTGGCTTACATGGTAGTGTGC
			Chr3 qArm Fwd	CCGGTTCCAGAATCTGAG		113
			Chr3 qArm Rev	TCCAGATCTTCAGATGGGAC
		Probes	Chr3 pArm Probe	GGTAAAGGAGTCCGAGAGATACCCG	FAM	N/A
			Chr3 qArm Probe	CCTTTGGCATCTCACACAGTGGAAATTC	HEX
	Chr13 ONT translocation	Primers	CCR5 Chr13 OFT Edge Fwd	TGTTAAAAAGTGTAACAGAGCTGG		172
			CCR5 3' Flanking Rev	AGGTAGATGTCAGTCATGCT
			SPIDR 3' Fwd	AAGGAGACTGCAGGCTAC		97
			SPIDR 3' Rev	GTTGGTGACTGCTGGATTAAG
		Probes	CCR5 3' Flanking Probe	CTGGTCATCCTCATCCTGATAAACTGC	FAM	N/A
			SPIDR 3' Probe	CAGGGAGGGAAGATCCGGAC	HEX
	Sequencing	Primers	CCR5 Seq Fwd	GTGGACAGGGAAGCTAGC		414
			CCR5 Seq Rev	GCAGGTAGATGTCAGTCATGC
	Long-read sequencing	Primers	CCR5 Long-read Seq Fwd	GACACAGGGTTAATGTGAAGTCC		5045
			CCR5 Long-read Seq Rev	GCTTCCCTCACCTCTATGG
	CCR5 LoD cassette generation
	Assay	Primer/Probe	Identifier	Sequence (5' > 3')	Flurophore	Amplicon length (bp)
	Full CCR5 sequence (SPIDR)	Primers	SPDR HK Rev	GTTGGTGACTGCTGGATTAAG		421
			SPIDRflag	GAATGAAGTCTTTAAACGTCAGTACATCAGGGGTGAGCATCGTAGTGTCTCTG
	Full CCR5 sequence (CCR5)	Primers	CCR5 Fwd	TTGCATTCATGGAGGGCAAC		432
			CCR5flag	CCCTGATGTACTGACGTTTAAAGACTTCATTCAGAAGATTCCAGAGAAGAAGCC
	CCR5 unbalanced large deletion (CCR5)	Primers	CCR5unbDel	CACAGGGTGGAACAAGATGG		385
			CCR5flag	CCCTGATGTACTGACGTTTAAAGACTTCATTCAGAAGATTCCAGAGAAGAAGCC
	CCR5 unbalanced large deletion (SPDR)	Primers	SPDR HK Rv	GTTGGTGACTGCTGGATTAAG		421
			SPIDRflag	GAATGAAGTCTTTAAACGTCAGTACATCAGGGGTGAGCATCGTAGTGTCTCTG
	CCR5 Off-Targets
	Assay	Primer/Probe	Identifier	Sequence (5' > 3')	Flurophore	Amplicon length (bp)
	Edge
	Chr. 1 Off-target	Primers	Chr1 OFT Edge Fwd	GCACCGGACAAGAGAAG		155
			Chr1 OFT Edge Rev	CCTGCAAAAGAGGGCTG
		Probes	Chr1 OFT Edge Cleavage Probe	TAACTGGGTAGAAGGAGGCAGGG	FAM	N/A
			Chr1 OFT Edge Distal Probe	ATTCCGGAAGAGAGATTAGAGGCAGGG	HEX
	Chr. 13 Off-target	Primers	Chr13 OFT Edge Fwd	TGTTAAAAAGTGTAACAGAGCTGG		145
			Chr13 OFT Edge Rev	CCATGGTGTAATGGAACCATTC
		Probes	Chr13 OFT Edge Cleavage Probe	AAGGAGGAGAGCGGAGGCAG	FAM	N/A
			Chr13 OFT Edge Distal Probe	TGTCTCACAGGCACAGCACAGC	HEX
	Chr. 19 Off-target	Primers	Chr19 OFT Edge Fwd	TGAGGACAGCTACTCTGAAATC		164
			Chr19 OFT Edge Rev	CGGCTGAAGCATCTTTTCC
		Probes	Chr19 OFT Edge Cleavage Probe	CCGAGTAGGAGAGGAGGCAGGA	FAM	N/A
			Chr19 OFT Edge Distal Probe	CTGCCCCCTTGCGAGTTTCAC	HEX
	Flanking
	Chr. 1 Off-target	Primers	Chr1 OFT 5' Flanking Fwd	ACTACTAACAAATGCACAGACAGG		137
			Chr1 OFT 5' Flanking Rev	GATCGCTTATTTCGCAGCTC
			Chr1 OFT 3' Flanking Fwd	CTCCAGCTGTTTGCATGAATC		176
			Chr1 OFT3' Flanking Rev	ACTTCTCCCGGAATTCACAG
		Probes	Chr1 OFT 5' Flanking Probe	ACCCAGTTGAAAAGACCCAGTTGC	FAM	N/A
			Chr1 OFT 3' Flanking Probe	CCTCCTCAGGCACTAGAGCTTCC	HEX
	Chr. 13 Off-target	Primers	Chr13 OFT 5' Flanking Fwd	CCCACCAACAACAAAGTGA		132
			Chr13 OFT 5' Flanking Rev	CAGATTCTGGCACTTGCTC
			Chr13 OFT 3' Flanking Fwd	TTATAGGTCCCAAACTGCCAC		123
			Chr13 OFT 3' Flanking Rev	TGTTATCCTTCACCATCCACTC
		Probes	Chr13 OFT 5' Flanking Probe	AGTGCCAGTATTTTCATCCTATGTGCCA	FAM	N/A
			Chr13 OFT 3' Flanking Probe	CATCAGAGGGATCAGTCTAGGGACTAC	HEX
	Chr. 19 Off-target	Primers	Chr19 OFT 5' Flanking Fwd	ACGTGTCGAGGAAGTTTGTC		130
			Chr19 OFT 5' Flanking Rev	CAGAAACAGACTGCCTCCT
			Chr19 OFT 3' Flanking Fwd	CTGGCAGGAAAAGATGCTTC		145
			Chr19 OFT 3' Flanking Rev	GGAGTCAAAGTCATGCACAG
		Probes	Chr19 OFT 5' Flanking Probe	CCCACGGAAGACAGGCAGGT	FAM	N/A
			Chr19 OFT 3' Flanking Probe	CGCAGTGATGGGCAAAGGCTA	HEX
	XIAP
	Assay	Primer/Probe	Identifier	Sequence (5' > 3')	Flurophore	Amplicon length (bp)
	Edge	Primers	XIAP Edge & 5' Flanking Fwd	GGTTAAAATTACCAGCTGTAATTTG		227
			XIAP Edge & 3' Flanking Rev	ACAGATATATATGTAACACTGCC
		Probes	XIAP Edge Cleavage Probe	CA+T+G+A+CATACATGTGCCCTGCAG	FAM	N/A
			XIAP Edge Distal & 3' Flanking Probe	TTCCTGAGCCACCCTCTAGAG	HEX
	Flanking	Primers	XIAP Edge & 5' Flanking Fwd	GGTTAAAATTACCAGCTGTAATTTG		N/A
			XIAP 5' Flanking Rev	GCTATTAACTTCCCTTGGTC
			XIAP 3' Flanking Fwd	GCAATTAAGGTTTGCAGGTAC		74
			XIAP Edge & 3' Flanking Rev	ACAGATATATATGTAACACTGCC	FAM
		Probes	XIAP 5' Flanking Probe	AGTATTGCTGCAGTCTTATTAGAGCTG	HEX	N/A
			XIAP Edge Distal & 3' Flanking Probe	TTCCTGAGCCACCCTCTAGAG
	Targeted integration	Primers	SV40 TI Fwd	GTGATGCTATTGCTTTATTTGTAACC		889
			XIAP TI Rev	GCAGGTACACAAGTTTTAGATCC
			SPIDR Long Ref Fwd	GGATCTCCATTTTACACATAAGAC		882
			SPDR Ref Rev	GTTGGTGACTGCTGGATTAAG
		Probes	SV40 Probe	TGCATTCATTTTATGTTTCAGGTTCAGG	FAM	N/A
			SPIDR Ref Probe	CAGGGAGGGAAGATCCGGAC	HEX
	CD34
	Assay	Primer/Probe	Identifier	Sequence (5' > 3')	Flurophore	Amplicon length (bp)
	Edge	Primers	CD34 Edge & 5' Flanking & TI Fwd	GGTGGAGGGAAAGAAACAG		208
			CD34 Edge& 3' Flanking Rev	TCCAGAGACAACCTTGAAGC
		Probes	CD34 Edge Cleavage Probe	CCT+A+T+A+CATCATCTTCTCCTATCCT	FAM	N/A
			CD34 Edge Distal & 5' Flanking & TI Probe	CTTGCCTGCATACATATGAAGTGAGG	HEX
	Flanking	Primers	CD34 Edge & 5' Flanking & TI Fwd	GGTGGAGGGAAAGAAACAG		75
			CD34 5' Flanking Rev	GGTGAATTGGGCCAAAAATGG
			CD34 3' Flanking Fwd	GGCTAGTGCTAGTGGTTGA		71
			CD34 Edge & 3' Flanking Rev	TCCAGAGACAACCTTGAAGC
		Probes	CD34 Edge Distal & 5' Flanking Probe	CTTGCCTGCATACATATGAAGTGAGG		N/A
			CD34 3' Flanking Probe	ACCTGGAAATGTTTCAGACCT
	Targeted integration	Primers	CD34 Edge & 5' Flanking & TI Fwd	GGTGGAGGGAAAGAAACAG		137
			CD34 TI Rev	GAGTTGCAATTGGTTAATAACGGT
			SPDR Ref Fwd	AAGGAGACTGCAGGCTAC		97
			SPDR Ref Rev	GTTGGTGACTGCTGGATTAAG
		Probes	CD34 Edge Distal & 5' Flanking & TI Probe	CTTGCCTGCATACATATGAAGTGAGG	HEX	N/A
			SPIDR Ref Probe	CAGGGAGGGAAGATCCGGAC	FAM
	RIMA	Primers	RIMA Fwd	CCAGCCAACGTTTCAACTCC		185
			RIMA Rev	TGAGGGGCAATCTGCCATTT
	CCR5 (Second locus)
		Primer/Probe	Identifier	Sequence (5' > 3')	Flurophore	Amplicon length (bp)
	Edge	Primers	CCR5 Edge Fwd	AAGAGCATGACTGACATCTACC		134
			CCR5 Edge Rev	CCTGTCAAGAGTTGACACATTG
		Probes	CCR5 Edge Cleavage Pb	CCTTCTGGGCTCACTATGCTGC	FAM	N/A
			CCR5 Edge Distal Pb	AGGTCAGAGATGGCCAGGTTGA	HEX
	Targeted integration	Primers	CCR5 TI Fwd	GGGAGGATTGGGAAGACA		557
			CCR5 TI Rev	AGGTGTTCAGGAGAAGGACA
			SPIDR Medium Ref Fwd	CTTGGAGTAAAACGCATGCTC		557
			SPDR Ref Rev	GTTGGTGACTGCTGGATTAAG
		Probes	CCR5 TI Probe	AGCAGGCATGCTGGGGATGCGGTGG	HEX	N/A
			SPIDR Ref Probe	CAGGGAGGGAAGATCCGGAC	FAM
	References and GFP
	Assay	Primer/Probe	Identifier	Sequence (5' > 3')	Flurophore	Amplicon length (bp)
	GFP	Primers	GFP Fwd	CACCCAGTCCGCCCTG		89
			GFP Rev	GTACAGCTCGTCCATGCCG
		Probes	GFP Probe	CTGGAGTTCGTGACCGCC	FAM	N/A
	Ref 1/ DNA Integrity	Primers	SPIDR 5' Fwd	ACTTTGCAAAATGTGGAGACCA		99
			SPIDR 5' Rev	AGACAGATGGTTCAAGCGTG
			SPIDR 3' Fwd	AAGGAGACTGCAGGCTAC		97
			SPIDR 3' Rev	GTTGGTGACTGCTGGATTAAG
		Probes	SPIDR 5' Probe	TGCAGATAGCACTCTTCACCTGGAGA	FAM	N/A
			SPIDR 3' Probe	CAGGGAGGGAAGATCCGGAC	HEX
	Ref 2/ DNA Integrity*	Primers	Ref 2 5' Fwd	AGGGCAACTAAATACATTCTAGGAC		127
			Ref 2 5' Rev	CAGGGCTCCGATGTATAATAATTG
			Ref 2 3' Fwd	CTTTGGTTTTGTGGGCAAC		81
			Ref 2 3' Rev	AGGTAGATGTCAGTCATGCT
		Probes	Ref 2 3' Probe	CTGGTCATCCTCATCCTGATAAACTGC	FAM	N/A
			Ref 2 5' Probe	ATGCACAGGGTGGAACAAGATGGATTATC	HEX
	Ref 3/ DNA Integrity**	Primers	Ref 3 5' Fwd	CCTAGATCTAAGCTTCTCTGTCTTC		93
			Ref 3 5' Rev	GAGAGAGAGTAGATGTGTGAGC
			Ref 3 3' Fwd	CTTTACTTCAAGTCGTTTCTGGAG		119
			Ref 3 3' Rev	GTTAGGGAACTGAATAACCTGAAAC
		Probes	Ref 3 3' Probe	TCCCTCCCTTCCTCTTACTCTCATTCATT	FAM	N/A
			Ref 3 5' Probe	TGGCTATGCTCAAAATGGTGAGTCATTTCT	HEX
	AAV titration
	Assay	Primer/Probe	Identifier	Sequence (5' > 3')	Flurophore	Amplicon length (bp)
	ITR	Primers	AAV_ITR_Fwd	GGAACCCCTAGTGATGGAGTT		62
			AAV_ITR_Rev	CGGCCTCAGTGAGCGA
		Probes	AAV_ITR_Probe	CACTCCCTCTCTGCGCGCTCG	FAM	N/A
	GFP	Primers	AAV_GFP__Fwd	CACCCAGTCCGCCCTG		106
			AAV_GFP__Rev	GTACAGCTCGTCCATGCCG
		Probes	GFP_Probe	CTGGAGTTCGTGACCGCC	HEX
	*CCR5 flanking used as second reference where appropriate
	**IL7R flanking used as second reference where appropriate
	"+" denotes locked base oligo (LNA) and that the next base in the sequence is locked
	"P" denotes phosphate modification
	"NH2" denotes primary amine modification

## Sheet: Table 2 sgRNA sequences
	sgRNA Target	sgRNA Sequence 5' >3'	Target location (Human; GRCh38/hg38)	Chromosome Arm
	WAS	GCAGAAAGCACCAUGAGUGG	chrX:48,683,842-48,683,861	p Arm 11.23
	EMX1	GAGUCCGAGCAGAAGAAGAA	chr2:72,933,853-72,933,872	p Arm 13.2
	FANCF	GGAAUCCCUUCUGCAGCACC	chr11:22,625,789-22,625,808	p Arm 14.3
	RAG1	GCCUCUUUCCCACCCACCUU	chr11:36,573,311-36,573,330	p Arm 11p2
	VEGFA	GGUGAGUGAGUGUGUGCGUG	chr6:43,769,717-43,769,736	p Arm 21.1
	BTK	GAUGCUCUCCAGAAUCACUG	chrX:101,375,258-101,375,277	q Arm 22.1
	IL7R	UCUCUCAGAAUGACAAUUCU	chr5:35,856,969-35,856,988	p Arm 13.2
	SH2D1A (Cas9)	AUACACAGCCACUGCGUCCA	chrX:124,346,644-124,346,663	q Arm 25
	SH2D1A (Cas12a)	CGCAGUGGCUGUGUAUCAUGG	chrX:124,346,648-124,346,668	q Arm 25
	CCR5	GUGAGUAGAGCGGAGGCAGG	chr3:46,372,998-46,373,017	p Arm 21.31
	CD34 (Cas9)	AUAGGAGAAGAUGAUGUAUA	chr1: 207,898,989-207,899,008	q Arm 32.2
	CD34 (SpOT-ON Cas9)	GGAUAGGAGAAGAUGAUGUAUA	chr1: 207,898,987-207,899,008	q Arm 32.2
	CCR5 (sg11)	GCAGCAUAGUGAGCCCAGAA	chr3:46,373,152- 46,373,174	p Arm 21.31

## Sheet: Table 3 Donor template sequence
	WAS insertion sequences	TGGAGTGCAGTGGTGCAGTCTCAGCTCACTGCAACCTCCGCCTCCTGGGTTCAAGCGATTCTCCTGCCTCAGCCTCCTGAGCAGCTAGGACTACAGGTGTGTGCCACCATGCCTGGCTAATTTTTGTATTTTTTAGTGGAAATGGGGTTTTGCCATGTTGCCCAGGCTCGTCTTGAACTCCTGACCTCAAGTGATCCACTCGTCTCGGCCTCCCAAAGTGCTGGGATTACAGGTGTGAGCTATTGTCCCCAGCCAAAAGGAAAAGTTTTACTGTAGTAACCCTTCCGGACTAGGGACCTCGGGCCTCAGCCTCAGGCTACCTAGGTGCTTTAGAAAGGAGGCCACCCAGGCCCATGACTACTCCTTGCCACAGGGAGCCCTGCACACAGATGTGCTAAG…
	BTK insertion sequences	CAGAGGTGGCATCTATATCAGTAAGACAGTTGCATCACTTTTGCATGATGCTGTCTAAAAGAACTAATTTAAGCTAAATGGGGAAAAGGTCAGAAAACAACAACTACCCCCCCCCCACCAAAACCCACCAAAAAAAATTATGTTTTCAACTTTAGAACAAATCTTCTATCCTTTGTAGCTCAGTCAGTGGGTGTGGGCAAAATCAGTTGGGCAGCAGTTAGTGTGTGTCCAGAACTGCAGGTGCAGCCTCCATATCCTTATTAGTTCCCTTGGTTACAGACCCCAGTGGGACAATGTTTGAAAAATTATATTCACCGTCTAGGAAATTGGGAACTGAAAGTCCAATATCTGCCTCAGTGGAGTTCTGGCACCTGCATTATCCCTTCTGGGTATATCAAG…
	CD34 ssODN	TTATTATACATCGGAGCCCTGCCAAAAAATCAATGTGAAGCAAATCGCAGCCCGCCTCCTGTTTAATTGAGTTGCAATTGGTTAATAACGGTATGCCTCCGCTCTACTCACTGGTGTTCATCTTTGGTTTTGTGGGCAACATGCTGGTCATCCT
	*Blue: LHA,Pink: PGK promotor,Green: GFP,Black:BGHpA,Purple: custom sequences,Orange: RHA

## Sheet: Table 4 PCR conditions
	Short ddPCR
	PCR Cycling Conditions	Temp. (°C)	Time	Cycles
	Int. Denaturation	95	10 min	1
	Denaturation	95	45 sec	40
	Annealing	54	45 sec
	Extension	72	1 min	1
	Final Extension	72	10 sec	1
	Hold	4	-	-
	Long ddPCR (AAV transduced cells)
	PCR Cycling Conditions	Temp. (°C)	Time	Cycles
	Int. Denaturation	95	10 min	1
	Denaturation	95	45 sec	40
	Annealing	54	45 sec
	Extension	72	5 min	1
	Final Extension	72	10 sec	1
	Hold	4	-	-
	Library ddPCR
	PCR Cycling Conditions	Temp. (°C)	Time	Cycles
	Int. Denaturation	95	10 min	1
	Denaturation	94	30 sec	40
	Annealing/Extension	60	1 min
	Enzyme deactivation	98	10 sec	1
	Hold	4	-	-
	Sequencing
	PCR Cycling Conditions	Temp. (°C)	Time	Cycles
	Int. Denaturation	98	5 m	1
	Denaturation	98	20 s	40
	Annealing	Various	20 s
	Extension	72	60 s
	Final Extension	72	1 m	1
	Hold	4	-	-
	Large deletion sequencing
	PCR Cycling Conditions	Temp. (°C)	Time	Cycles
	Int. Denaturation	98	5 m	1
	Denaturation	98	45s	40
	Annealing	Various	45s
	Extension	72	6m
	Final Extension	72	1m	1
	Hold	4	-	-
	CAST-Seq (PCR1)
	PCR Cycling Conditions	Temp. (°C)	Time	Cycles
	Int. Denaturation	96°C	5 min	1
	Denaturation	95°C	15 sec	20
	Annealing	63°C	20 sec
	Extension	72°C	20 sec
	Final Extension	72°C	2 min	1
	Hold	4	-	-
	CAST-Seq (PCR2)
	PCR Cycling Conditions	Temp. (°C)	Time	Cycles
	Int. Denaturation	96°C	5 min	1
	Denaturation	95°C	15 sec	20
	Annealing	68°C	20 sec
	Extension	72°C	20 sec
	Final Extension	72°C	2 min	1
	Hold	4	-	-
	NGS Barcoding
	PCR Cycling Conditions	Temp. (°C)	Time (s)	Cycles
	Int. Denaturation	98	30sec	1
	Denaturation	98	10sec	7
	Annealing	65	75sec
	Extension	-	-	-
	Final Extension	65	5min	1
	Hold	4	-	-
	RIMA(Sequencing PCR)
	PCR Cycling Conditions	Temp. (°C)	Time (s)	Cycles
	Int. Denaturation	98	3min	1
	Denaturation	98	10sec	30
	Annealing	60	5sec
	Extension	72	5sec
	Final Extension	-	-	-
	Hold	4	-	-
	RIMA(Indexing PCR)
	PCR Cycling Conditions	Temp. (°C)	Time (s)	Cycles
	Int. Denaturation 1	72	3min	1
	Int. Denaturation 2	98	30sec	1
	Denaturation	98	10sec	10
	Annealing	63	30sec
	Extension	72	3min
	Final Extension	72	5min	1
	Hold	4	-	-

## Sheet: Table 5 Materials
	Protocol	Equipment	Company	Cat no.
	Cell culture	Countess™ Cell Counting Chamber Slides	Invitrogen™	C10228
		Countess™ 3 Automated Cell Counter	Invitrogen™	AMQAX2000
		FBS, Qualified, HI	Gibco	26140079
		Penicillin/Streptomycin	Gibco	15140122
		Phosphate Buffered Saline (PBS)	Gibco	14190144
		RPMI 1640 Medium, GlutaMAX™ Supplement	Gibco	61870036
		DMEM, high glucose, GlutaMAX™ supplement	ThermoFisher	61965-059
		Trypan Blue Solution, 0.4%	Gibco	5250061
		Human CD34 MicroBead Kit	Miltenyi Bioscience	130-046-702
		StemSpan SFEM Hematopoietic Cell Culture Medium	Stemcell Technologies	9655
		Recombinant Human TPO	Peprotech	300-18
		Recombinant Human SCF	Peprotech	300-07
		Recombinant Human Flt3-Ligand	Peprotech	300-19
		Recombinant Human IL-3	Peprotech	200-03
		TexMACS Medium	Miltenyi Bioscience	130-097-196
		Human serum	Merck	H5667
		Recombinant Human IL-2	Peprotech	200-02
		Human T-Activator CD3/CD28 Dynabeads	Gibco	11131D
		Sodium pyruvate	Gibco	11360070
		HEPES 1M	ThermoFisher	15630-056
		DEF-CS GF-1,DEF-CS GF-2,DEF-CS GF-3	Takara Bio	Y30016
		Trypsin-EDTA (0.05%)	ThermoFisher	25300-104
	Editing	Alt-R™ S.p. Cas9 Nuclease V3, 100µg	IDT	1081058
		Alt-R™ A.s. Cas12a (Cpf1) V3, 100µg	IDT	1081068
		SF Cell Line 4D-Nucleofector™ Core Unit	Lonza	AAF-1002B
		SF Cell Line 4D-Nucleofector™ X Unit	Lonza	AAF-1002X
		SF Cell Line 4D-Nucleofector™ X Unit	Lonza	AAF-1002X
		P3 Primary Cell 96-well Nucleofector™ Kit	Lonza	V4SP-3096
		P3 Primary Cells	Lonza	V4XP-9096
		SF Cell Lines	Lonza	V4XC-2032
	DNA extraction	Monarch® Genomic DNA Purification Kit	New England Biolabs	T3010S
		Monarch® HMW DNA Extraction Kit for Cells & Blood	New England Biolabs	T3050L
		Monarch® PCR& DNA Cleanup Kit	New England Biolabs	T130L
		DraI & rCursmart buffer	New England Biolabs	R0129S
		Nanodrop™ OneC	Thermo Scientific™	ND-ONE-W
	ddPCR	QX200 Droplet Digital PCR (ddPCR) System	Bio-Rad	1864001
		QX200 Droplet Generator	Bio-Rad	1864002
		PX1™ PCR Plate Sealer	Bio-Rad	1814000
		C1000 Touch™ Thermocycler	Bio-Rad	1851197
		QX200 Droplet Reader	Bio-Rad	1864003
		ddPCR™ Supermix for Probes (No dUTP)	Bio-Rad	1863023
		ddpCR™ 96-Well Plates	Bio-Rad	12001925
		Droplet Generation Oil for Probes	Bio-Rad	1863005
		PCR Plate Heat Seal, foil, pierceable	Bio-Rad	1814040
		QuantaSoft™ Analysis Pro	Bio-Rad	V 2.1
		PrimeTime Probes	IDT	N/A
		ddPCR™ Library Quantification Kit for Illumina TruSeq	Bio-Rad	1863040
	PCR	Q5® reaction buffer	New England BioLabs	B9027S
		Deoxynucleotide (dNTP) Solution Mix	New England BioLabs	N0447S
		Q5® Hot Start High-Fidelity DNA Polymerase	New England BioLabs	M0493L
		Mastercycler® X50s	Eppendorf AG	6311JI114169
		Phusion Flash High-Fidelity 2x Mastermix	Thermo Scientific	F548
		Monarch® PCR & DNA Cleanup Kit (5µg)	New England BioLabs	T1030L
	Gel electrophoresis	Gel Loading Dye Purple (6X), no SDS	New England BioLabs	B7025S
		SYBR™ Safe DNA Gel Stain	Invitrogen™ - Thermo Fisher Scientific	S33102
		Quick-Load® Purple 1kb Plus DNA Ladder	New England BioLabs	N0550S
		Tris Acetate EDTA	Severn Biotech LTD.	20-6001-50
		UltraPure™ Agarose	Invitrogen™ - Thermo Fisher Scientific	16500-500
	Gel imaging	ChemiDoc MP Imaging System	Bio-Rad	12003154
	Gel extraction	Monarch® DNA Gel Extraction Kit	New England BioLabs	T1020S
	Sequencing	TubeSeq	Eurofins Genomics	N/A
	T7EI assay	EnGen T7 Endonuclease 1	New England Biolabs	M0302S
		NEBuffer™ 2	New England Biolabs	B7002S
	Flow cytometry	TO-PRO™-3 Iodide	Invitrogen™	T3605
		Brilliant Violet 421™ anti-human CD34 Antibody	BioLegend	343610
		APC/Cyanine7 anti-human CD38 Antibody	BioLegend	303534
		APC anti-human CD45RA Antibody	BioLegend	304112
		PE/Cyanine7 anti-human CD90 (Thy1) Antibody	BioLegend	328124
		LSR II Flow Cytometer	BD Biosciences	BF-LSRII
	Protein expression and purification	HisTrap HP His tag protein purification columns	Cytiva	17524802
	Repair inhibitors	AZD7648	MedChemExpress	HY-111783
		ART558	MedChemExpress	HY-141520
		POLQi2 (WO2020243459)	AstraZeneca (Gothenburg, SE)	N/A
		Dimethyl sulfoxide (DMSO)	Sigma-Aldrich	900185
	RIMA	KAPA Taq EXtra HotStart ReadyMix	Roche	TXHSRMKB
		Phusion Flash High-Fidelity 2x Mastermix	Thermo Scientific	F548
		HighPrep PCR Clean-up System	MagBio Genomics	N/A
	CAST-Seq	NEBNext Ultra II FS DNA Library Prep Kit	New England Biolabs	E7805S
		NEBNext® Multiplex Oligos for Illumina® (96 Unique Dual Index Primer Pairs)	New England Biolabs	E6440S
		AMPure XP Bead-Based Reagent	Beckman Coulter	A63881
		Monarch® PCR& DNA Cleanup Kit	New England Biolabs	T130L
		UltraPure™ 1M Tris-HCI, pH 8.0	Invitrogen	15568025
		Sodium chloride	Sigma-Aldrich	S3014-5KG
	NGS	MiSeq Reagent Kit v3 (600-cycle)	Illumina	MS-102-3003
		NextSeq system	Illumina	N/A
		PhiX Control v3	Illumina	FC-110-3001
		Fragment analyzer	Agilent	N/A
		Qubit 4 Fluorometer	Life Technologies	N/A
		Sodium hydroxide	Sigma-Aldrich	S2770
	Large deletion	NEBNext Ultra II FS DNA Library Prep Kit	New England Biolabs	E7805S
		NEBNext® Multiplex Oligos for Illumina® (96 Unique Dual Index Primer Pairs)	New England Biolabs	E6440S
		AMPure XP Bead-Based Reagent	Beckman Coulter	A63881
	AAV Production	PEI (polyethylenimine MW 25000)	Polysciences	23966-1
		Opti-MEM™ I Reduced Serum Medium	ThermoFisher	31985054
		PEG8000 (polyethylene glycol 8000)	VWR	0159-500G
		Sodium chloride	Sigma-Aldrich	S3014-5KG
		UltraPure™ 1M Tris-HCI, pH 8.0	Invitrogen	15568025
		MgCl2 (1M)	ThermoFisher	AM9530G
		Benzonase® Nuclease, 250U/ml	Sigma-Aldrich	E8263-25KU
		Deoxycholic acid (sodium deoxycholate)	Sigma-Aldrich	D2510-100G
		OptiPrepTM Density Gradient Medium	Sigma-Aldrich	D1556-250ML
		Phenol Red Solution	Sigma-Aldrich	P0290-100ML
		KCl (2 M), RNase-free	ThermoFisher	AM9640G
		Pluronic F-68 Non-ionic Surfactant	Fisher Scientific	24040032
	XIAP	CD45 MicroBeads, human	Miltenyi Biotec	130-045-801
		MS Columns	Miltenyi Biotec	130-042-201
	Software	FlowJo™	BD Biosciences	V10.9
		GraphPad Prism	GraphPad Software	V8.1
		ICE Analysis	Synthego	V3.0
		Galaxy	Galaxy	version 24.0.rc1
